# Supplementary material
Source: MDPI journal article supplement (https://www.mdpi.com/2073-4352/11/7/823)
Supplement: s1 [file s1]

# Molecular and supramolecular structures of Cd(II) complexes with hydralazine-based ligands; A new example for cyclization of hydrazonophthalazine to triazolophthalazine

Saied M. Soliman<sup>1,\*</sup>, Raghdaa A. Massoud<sup>1</sup>, Hessa H. Al-Rasheed<sup>2,\*</sup> and Ayman El-Faham<sup>1,2</sup>

<sup>1</sup>Department of Chemistry, Faculty of Science, Alexandria University, P.O. Box 426, Ibrahimia, Alexandria 21321, Egypt; saied1soliman@yahoo.com (S.M.S.); raghdaamassoud@yahoo.com (R. A. M); aymanel\_faham@hotmail.com

<sup>2</sup>Department of Chemistry, College of Science, King Saud University, P.O. Box 2455, Riyadh 11451, Saudi Arabia; halbahli@ksu.edu.sa (H.H. A.); aelfaham@ksu.edu.sa (A.E-F.)

\* Correspondence: Saied M. Soliman: [saied1soliman@yahoo.com](mailto:saied1soliman@yahoo.com) (S.M.S), Tel.: +201111361059; and Ayman El-Faham: [aymanel\\_faham@hotmail.com](mailto:aymanel_faham@hotmail.com) (A.E-F.), Tel.: +966114673195

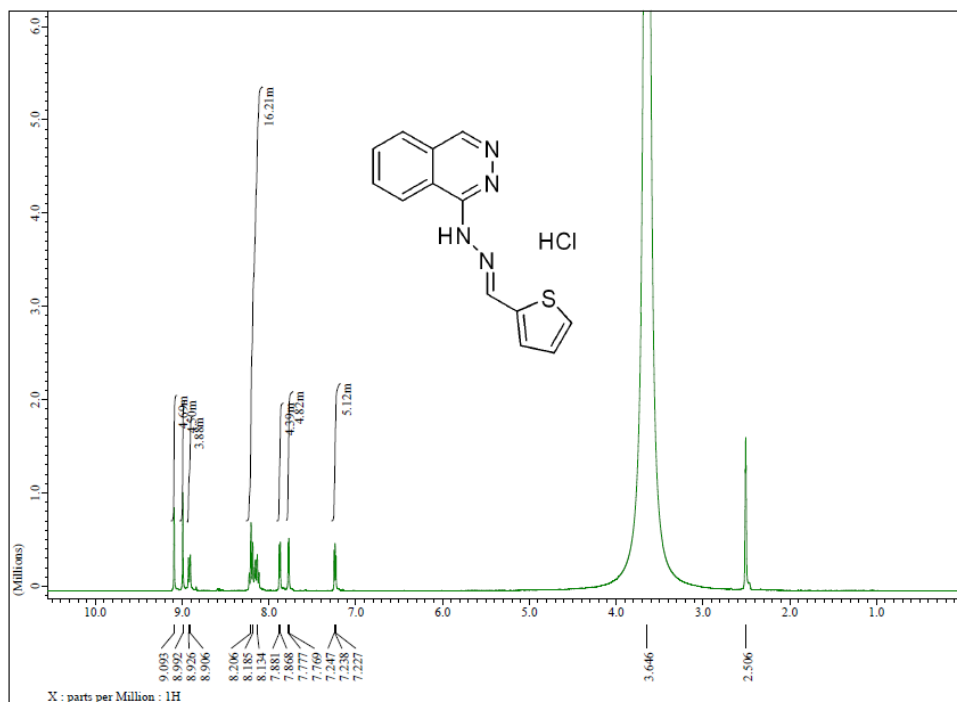

Figure S1. <sup>1</sup>H-NMR spectra of HL.

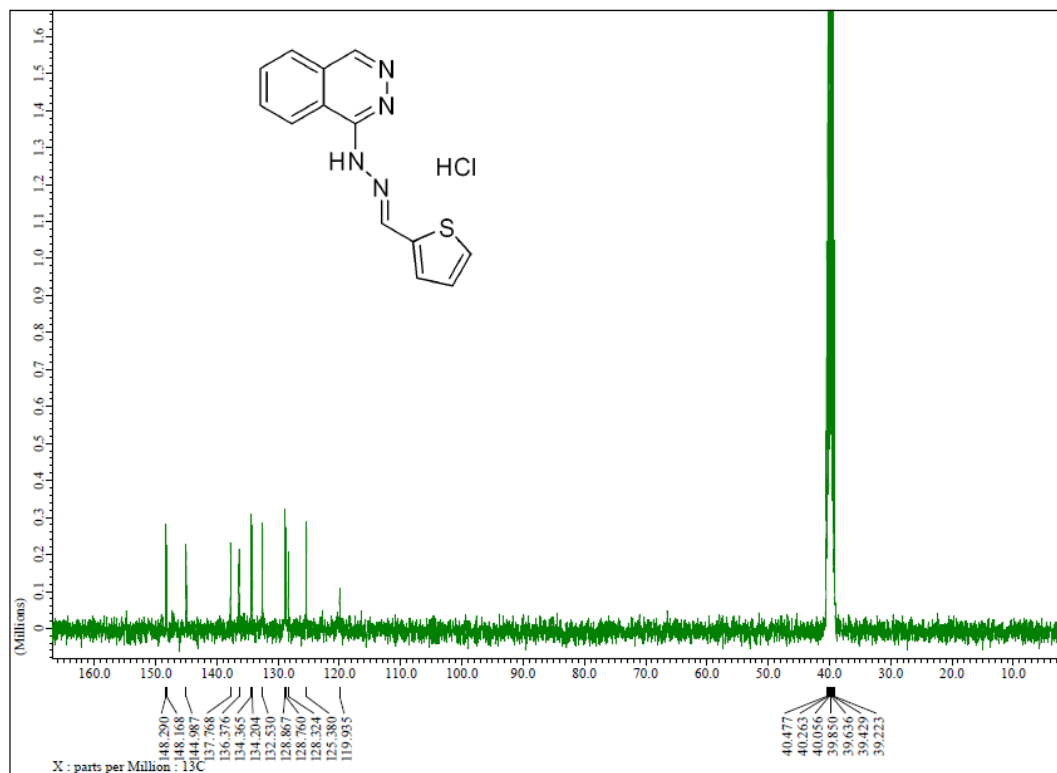

**Figure S2.**  $^{13}\text{C}$ -NMR spectra of HL.

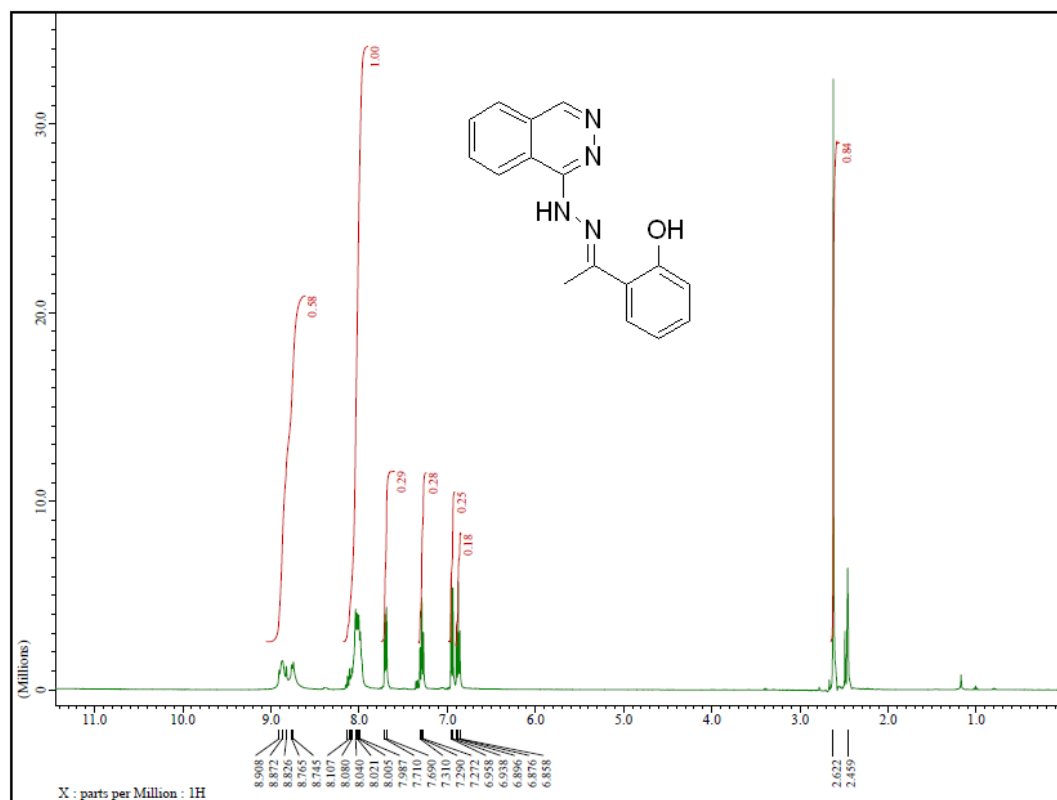

Figure S3.  $^1\text{H}$ -NMR spectra of  $\text{HL}^{\text{OH}}$ .

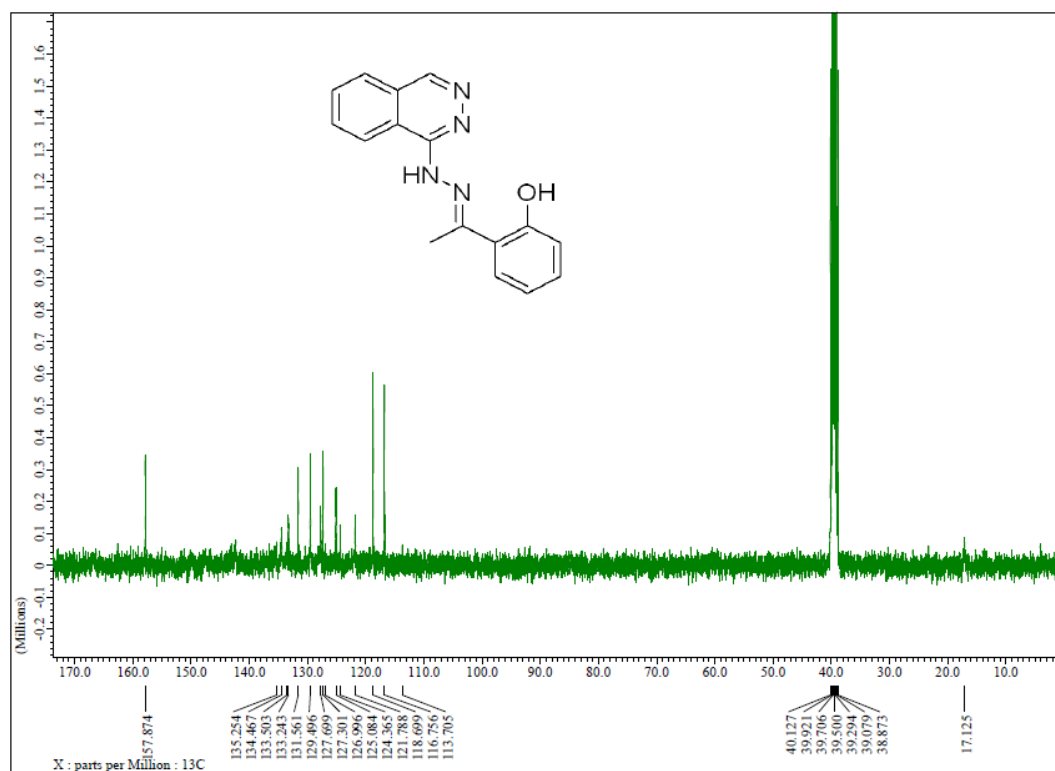

**Figure S4.**  $^{13}\text{C}$ -NMR spectra of  $\text{HL}^{\text{OH}}$ .

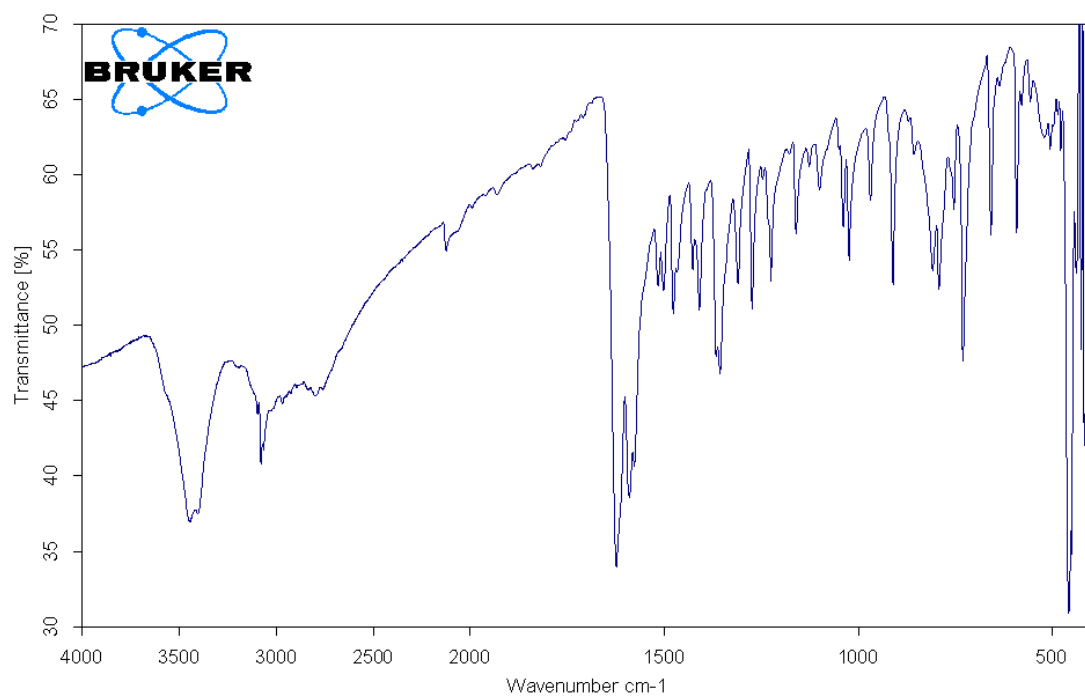

**Figure S5.** FTIR spectra of  $[\text{Cd}(\text{H}_2\text{L})\text{Cl}_3]_n \cdot \text{H}_2\text{O}$ ; **1**.

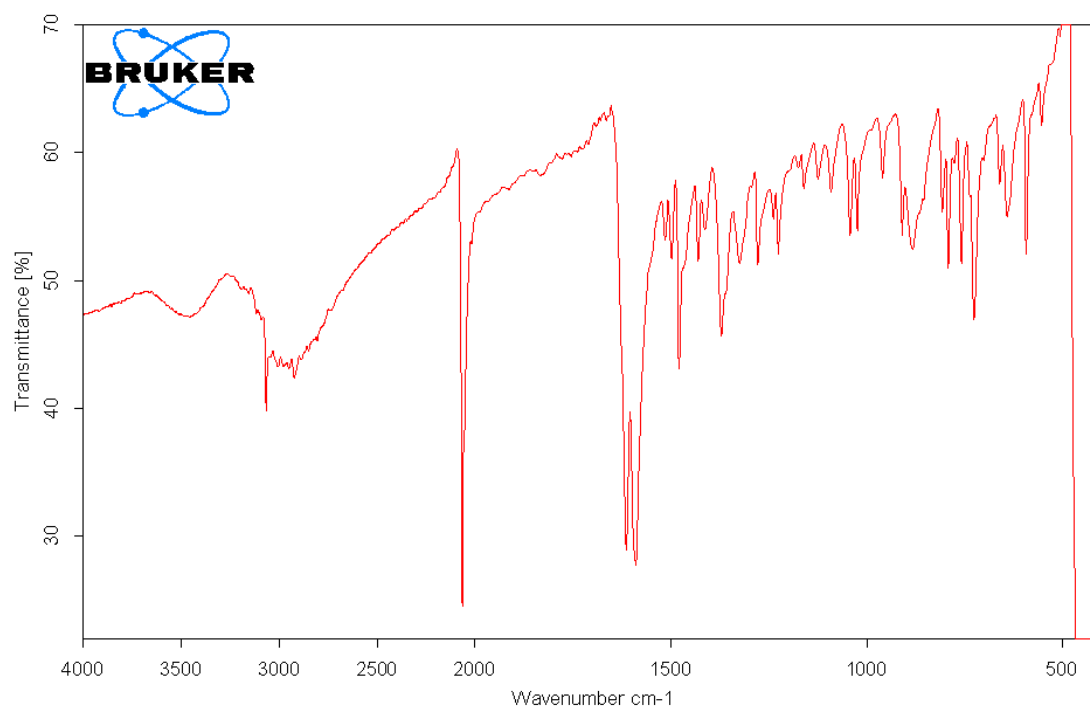

**Figure S6.** FTIR spectra of  $[\text{Cd}(\text{TPT})(\text{SCN})_2]_n \cdot \text{H}_2\text{O}$ ; **2**.

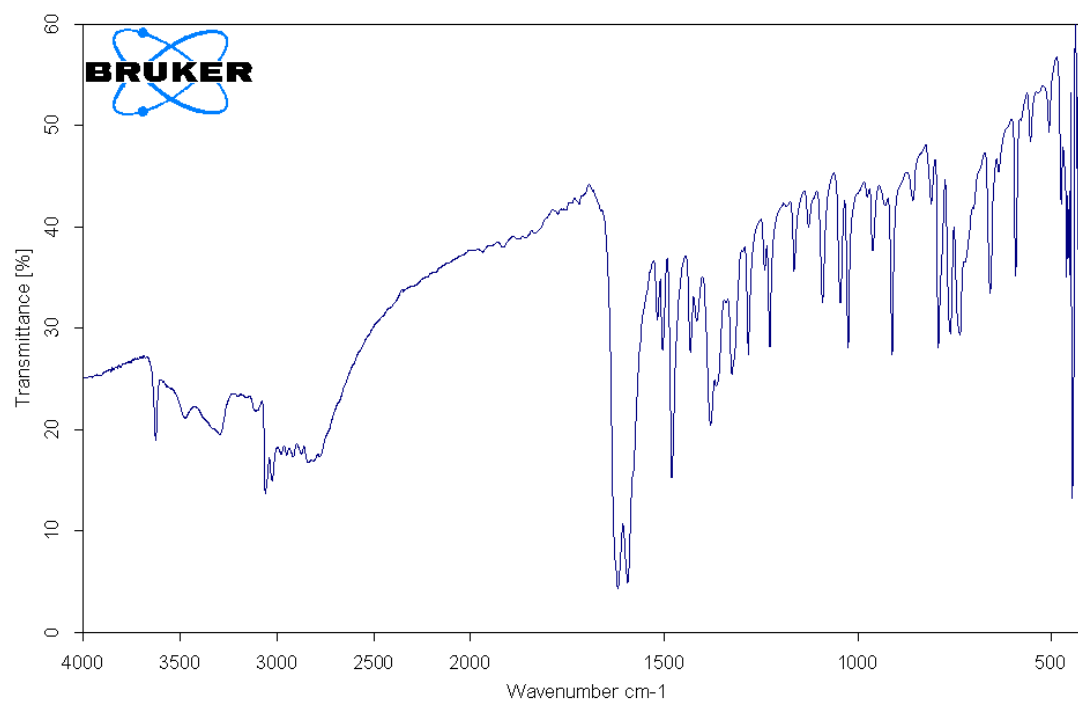

**Figure S7.** FTIR spectra of  $[\text{Cd}_3(\text{Hydralazine})_2(\text{H}_2\text{O})_2\text{Cl}_6]$ ; **3**.

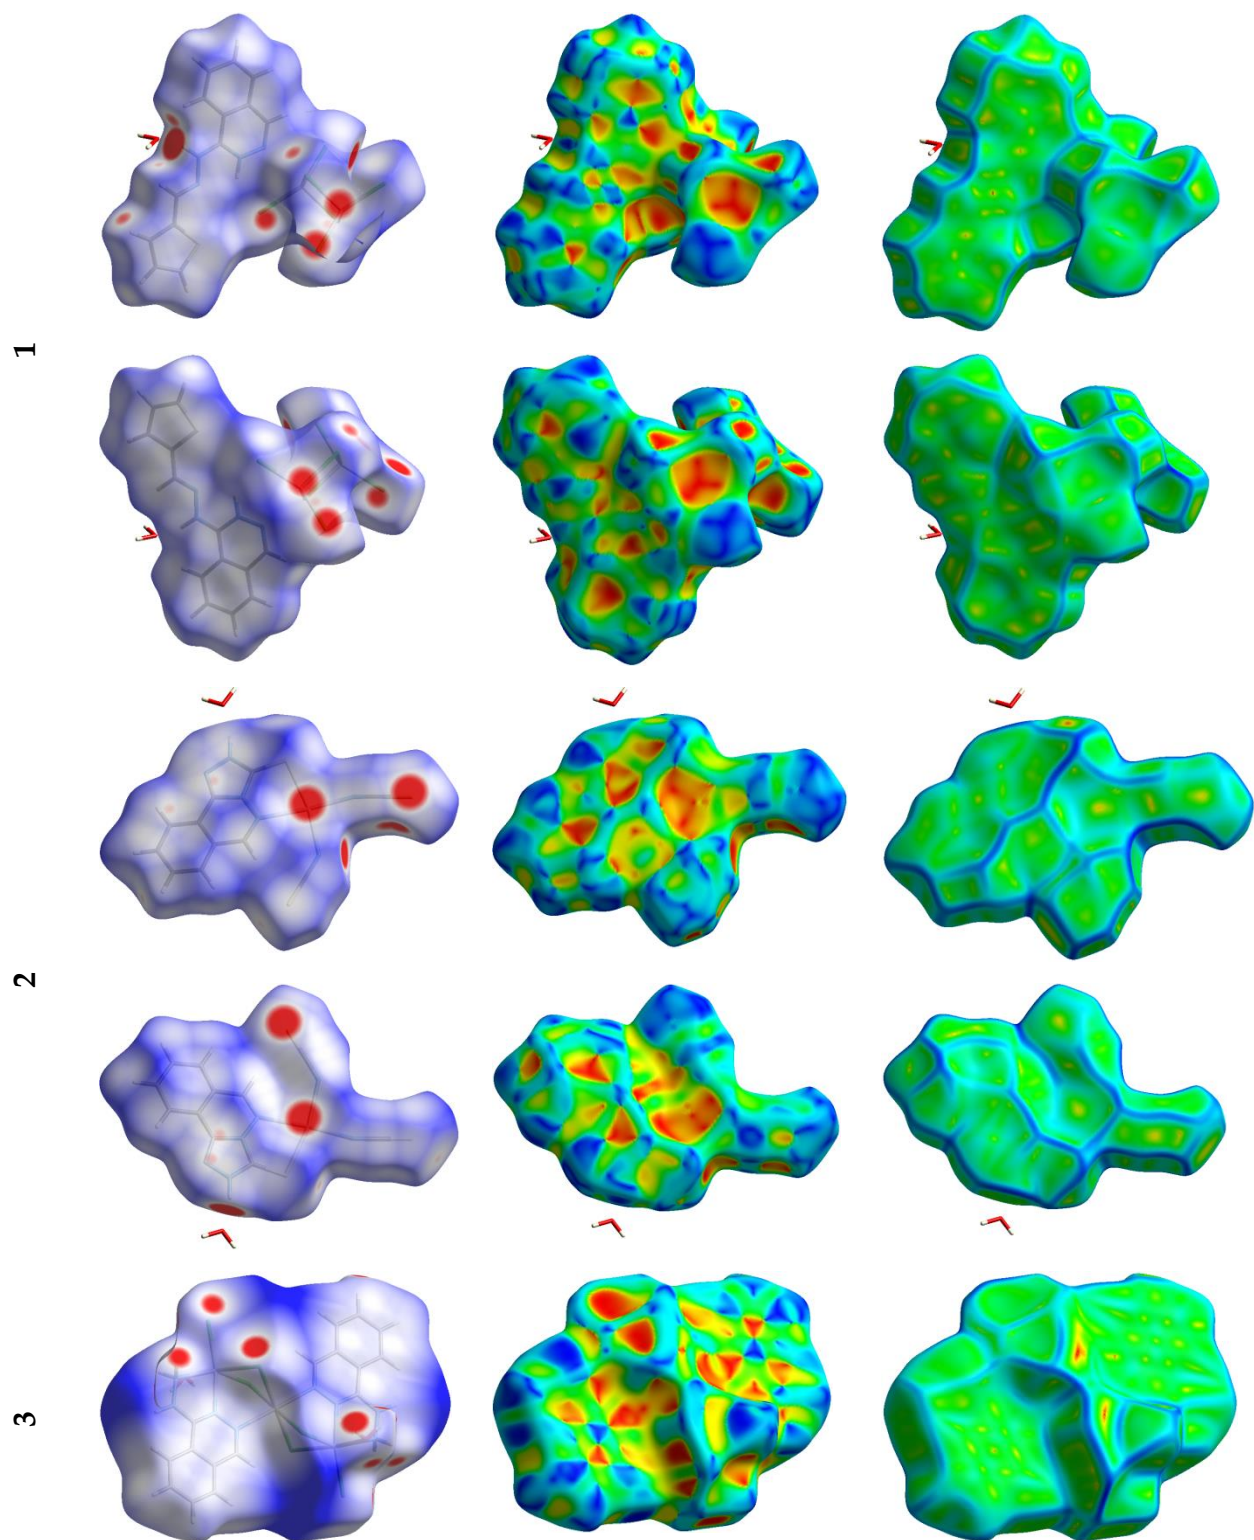



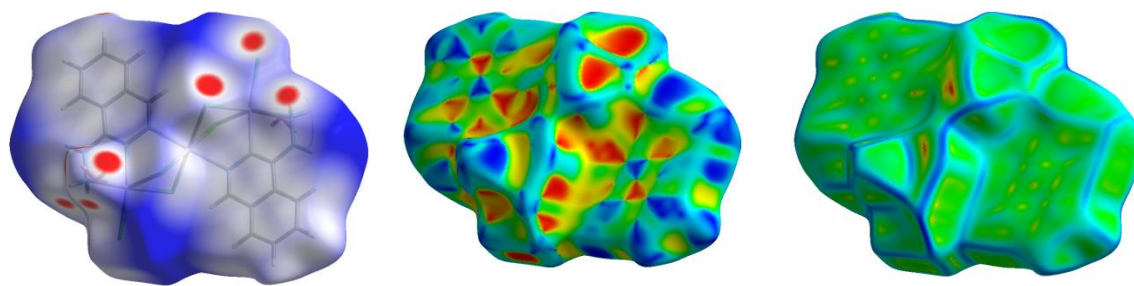

**Figure S8.** Hirshfeld  $d_{\text{norm}}$  (-0.2-2.0), shape index (SI) and curvedness surfaces of the studied complexes.
